# Supplementary material for: Predicting lignin depolymerization yields from quantifiable properties using fractionated biorefinery lignins
Source: Royal Society of Chemistry journal article supplement (doi:10.1039/c7gc02023f), 2017-01-01
Supplement: c7gc02023f1.pdf [file c7gc02023f1.pdf]

# SUPPLEMENTARY INFORMATION

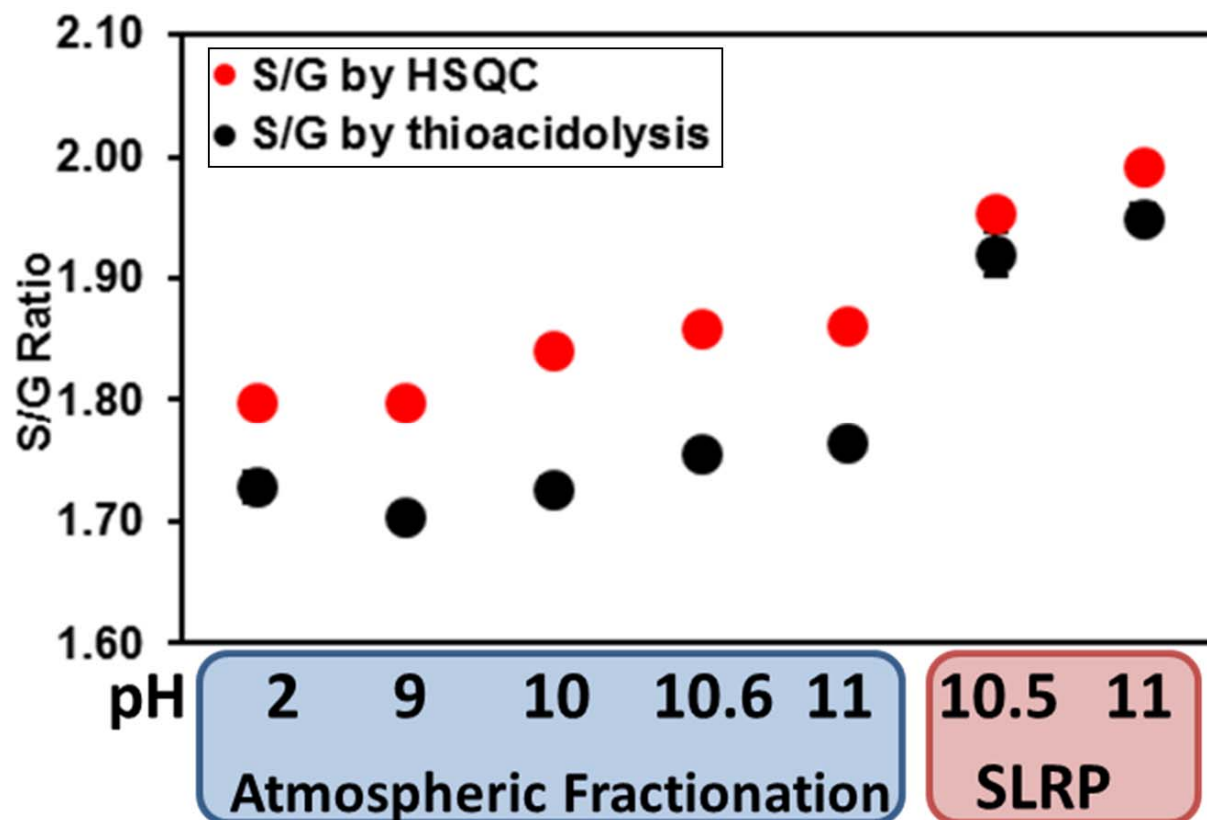

Supplemental Fig. S1. Trends of S/G ratios in fractionated lignin by HSQC NMR (red) and thioacidolysis (black) showing higher S/G values in fractions precipitated at higher pH and SLRP samples.

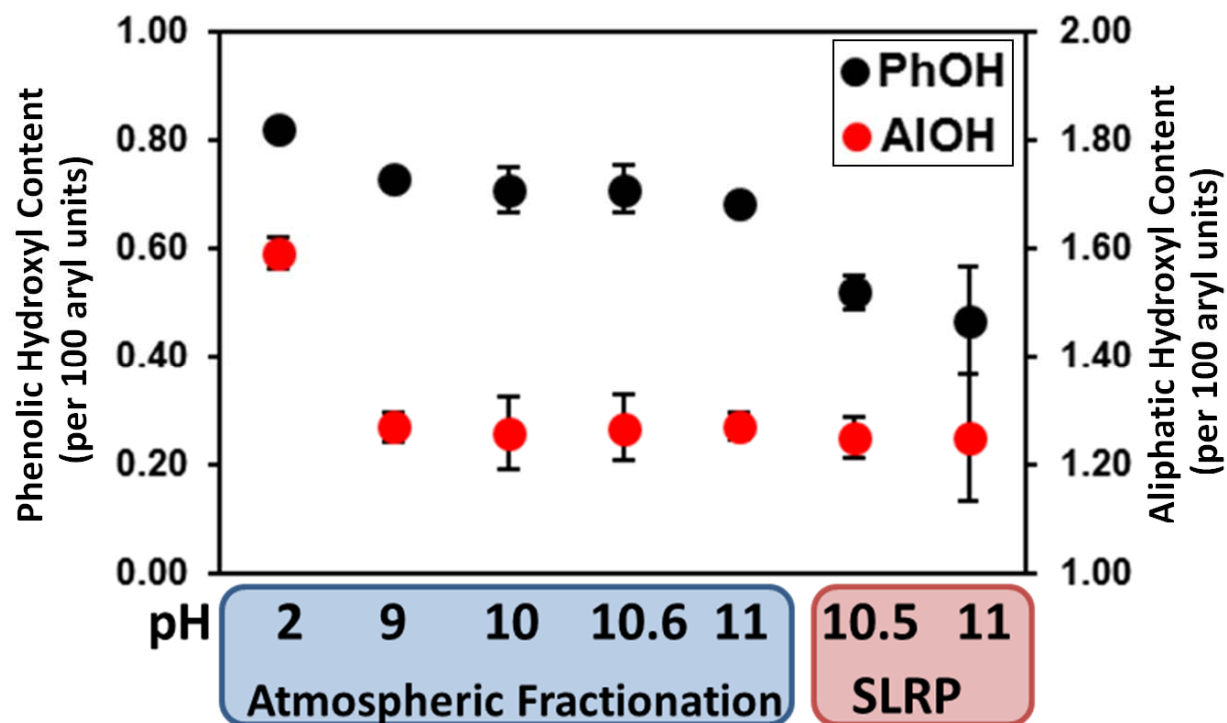

Supplemental Fig. S2. Trends of phenolic hydroxyl contents (black) in fractionated lignin showing lower values in fractions precipitated at higher pH, while aliphatic hydroxyl content (red) do not show any specific trend.

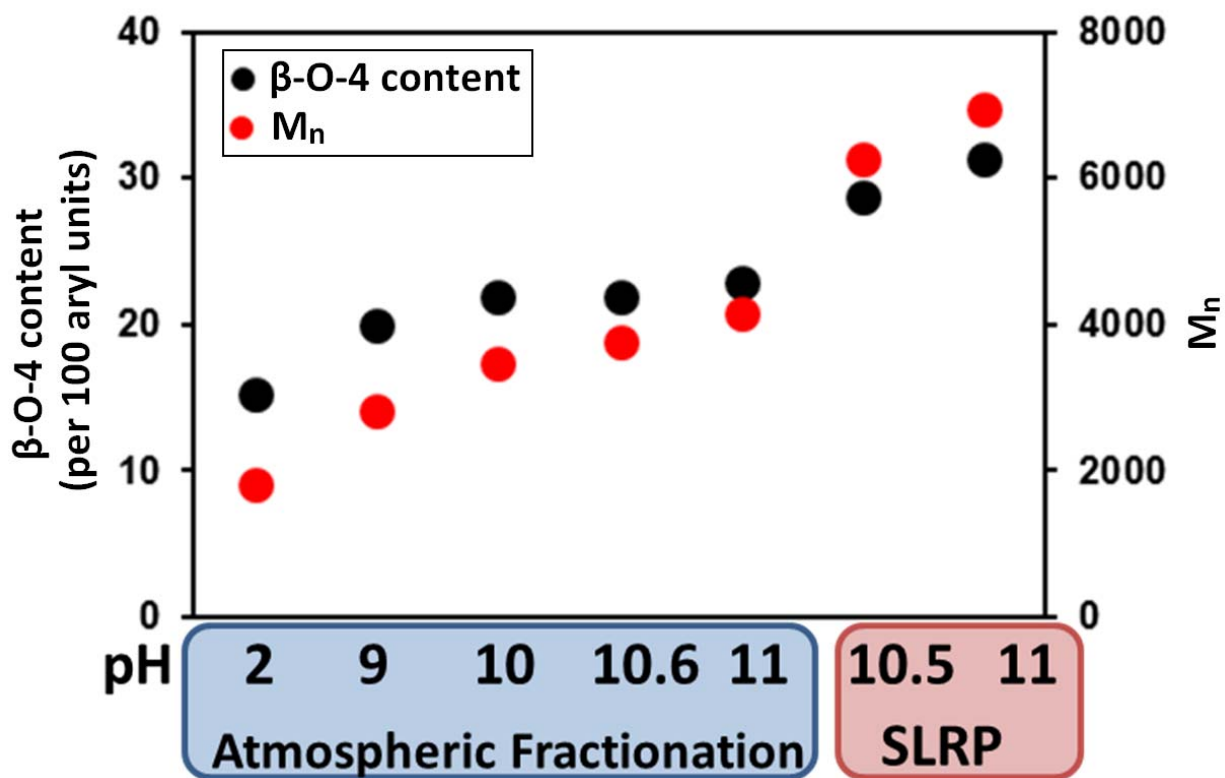

Supplemental Fig. S3. Trends of  $\beta$ -O-4 content (black) as measured by  $^{13}\text{C}$ -NMR and number average molecular weight among fractionated lignin showing similar increasing trend in fractions precipitated at higher pH and SLRP samples.

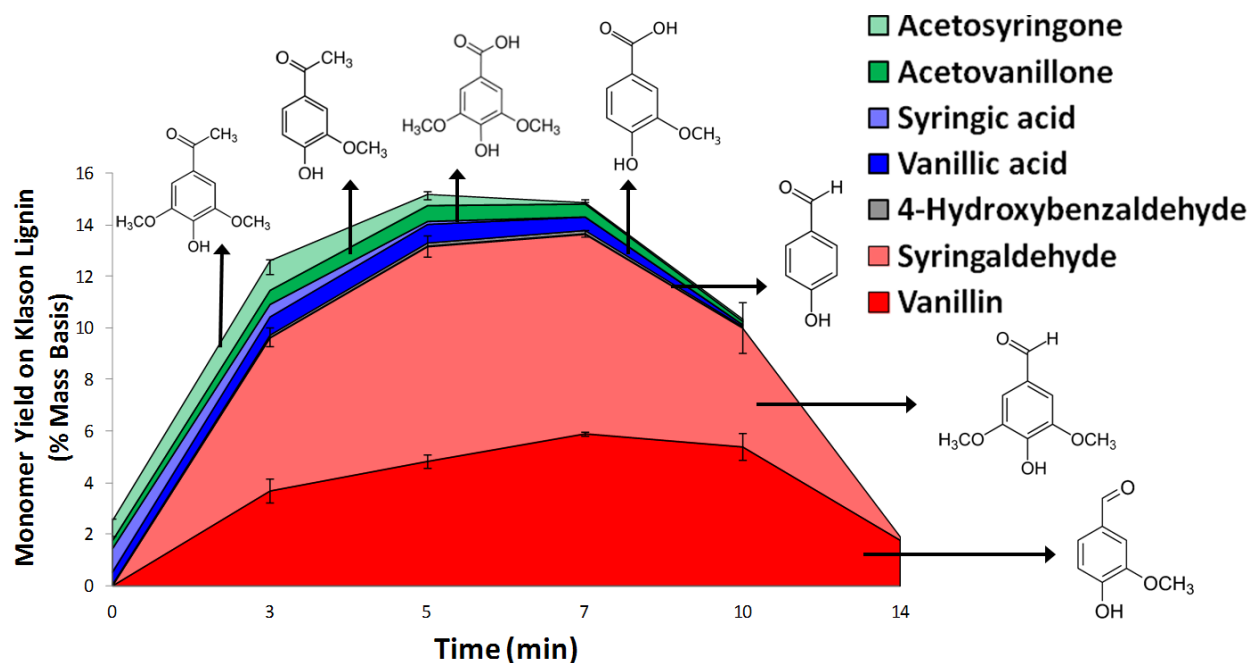

Supplemental Fig. S4. Kinetics of Cu-catalyzed oxidation of lignin sample SLRP-2 demonstrating reaction times for optimal yields.
